# Supplementary material
Source: publisher figshare collection journal article supplement (https://acs.figshare.com/ndownloader/files/4076737)
Supplement: Supplementary file 1 [file 4076737]

data_General
_audit_creation_date                    2012-10-29
_audit_creation_method                 'by CrystalStructure 4.0'
_audit_update_record                    ?

#==============================================================================
# PROCESSING SUMMARY (IUCr Office Use Only)

_journal_date_recd_electronic           ?
_journal_date_from_coeditor             ?
_journal_date_accepted                  ?
_journal_coeditor_code                  ?

#==============================================================================
# SUBMISSION DETAILS

_publ_contact_author_name             'Prof Hidemitsu Uno'
_publ_contact_author_email            'uno@dpc.ehime-u.ac.jp'
_publ_contact_author_fax              '+81-89-927-9610'
_publ_contact_author_phone            '+81-89-927-9610'
_publ_contact_author_address
;
Department of Chemistry and Biology,
Graduate School of Science and Engineering,
Ehime University, Matsuyama 790-8577, Japan
;
_publ_contact_letter
;
    ENTER TEXT OF LETTER
;
_publ_requested_journal               'ENTER JOURNAL NAME HERE'
_publ_requested_category              'CO'
_publ_requested_coeditor_name          ?
#==============================================================================
# TITLE AND AUTHOR LIST

_publ_section_title
;
    ENTER SECTION TITLE
;
_publ_section_title_footnote
;
    ENTER FOOTNOTE TO TITLE OF PAPER
;
loop_
_publ_author_name
_publ_author_footnote
_publ_author_address
' FIRST AUTHORS NAME '
;
  FIRST AUTHORS FOOTNOTES
;
;
  FIRST AUTHORS ADDRESS
;
_publ_section_synopsis
;
    ENTER SYNOPSIS
;

#==============================================================================
# TEXT

_publ_section_abstract
;
    ENTER ABSTRACT
;
_publ_section_comment
;
    ENTER TEXT
;
_publ_section_references
;
    ENTER OTHER REFERENCES

    Rigaku (2010). CrystalStructure. Version 4.0. 
    Rigaku Corporation, Tokyo, Japan.

    M.C. Burla, R. Caliandro, M. Camalli, B. Carrozzini, 
    G.L. Cascarano, L. De Caro, C. Giacovazzo, G. Polidori, 
    R. Spagna (2005) 
    SIR2004

    Sheldrick, G.M. (2008), Acta Cryst. A64, 112-122.

    Rigaku (1998). REQAB. 
    Rigaku Corporation, Tokyo, Japan.

;
_publ_section_figure_captions
;
    ENTER FIGURE CAPTIONS
;
_publ_section_exptl_prep
;
    ENTER COMPOUND PREPARATION DETAILS
;
_publ_section_exptl_refinement
;
    ENTER SPECIAL DETAILS OF THE REFINEMENT
;

#==============================================================================
data_sou07130A-1

#==============================================================================
# CHEMICAL DATA

_chemical_formula_sum                  'C20 H21 N O3 S'
_chemical_formula_moiety               'C20 H21 N O3 S'
_chemical_formula_weight                355.45
_chemical_melting_point                 ?
_chemical_absolute_configuration        rmad

#==============================================================================
# CRYSTAL DATA
_symmetry_cell_setting                  monoclinic
_symmetry_space_group_name_H-M         'P 1 21 1'
_symmetry_space_group_name_Hall        'P 2yb'
_symmetry_Int_Tables_number             4
loop_
_symmetry_equiv_pos_site_id
_symmetry_equiv_pos_as_xyz
1   '+X,+Y,+Z'
2   '-X,1/2+Y,-Z'
#------------------------------------------------------------------------------
_cell_length_a                          7.062(3)
_cell_length_b                          9.027(4)
_cell_length_c                          13.891(7)
_cell_angle_alpha                       90.0000
_cell_angle_beta                        101.281(6)
_cell_angle_gamma                       90.0000
_cell_volume                            868.4(7)
_cell_formula_units_Z                   2
_cell_measurement_reflns_used           3646
_cell_measurement_theta_min             1.50
_cell_measurement_theta_max             31.28
_cell_measurement_temperature           100
#------------------------------------------------------------------------------
_exptl_crystal_description              block
_exptl_crystal_colour                   colorless
_exptl_crystal_size_max                 0.200
_exptl_crystal_size_mid                 0.200
_exptl_crystal_size_min                 0.200
_exptl_crystal_density_diffrn           1.359
_exptl_crystal_density_method          'not measured'
_exptl_crystal_F_000                    376.00
_exptl_absorpt_coefficient_mu           0.205
_exptl_absorpt_correction_type          multi-scan
_exptl_absorpt_process_details         'REQAB (Rigaku, 1998)'
_exptl_absorpt_correction_T_min         0.877
_exptl_absorpt_correction_T_max         0.960

#==============================================================================
# EXPERIMENTAL DATA

_diffrn_ambient_temperature             100
_diffrn_radiation_type                 'Mo K\a'
_diffrn_radiation_wavelength            0.71075
_diffrn_measurement_device_type        'Rigaku Saturn724'
_diffrn_measurement_method              \w
_diffrn_detector_area_resol_mean        7.111
_diffrn_reflns_number                   7152
_diffrn_reflns_av_R_equivalents   0.0229 
_diffrn_reflns_av_sigmaI/netI     0.0429 
_diffrn_reflns_theta_max                27.50
_diffrn_reflns_theta_full               27.50
_diffrn_measured_fraction_theta_max     0.992
_diffrn_measured_fraction_theta_full    0.992
_diffrn_reflns_limit_h_min             -9
_diffrn_reflns_limit_h_max              9
_diffrn_reflns_limit_k_min             -11
_diffrn_reflns_limit_k_max              11
_diffrn_reflns_limit_l_min             -18
_diffrn_reflns_limit_l_max              18

#==============================================================================
# REFINEMENT DATA

_refine_special_details
;
 Refinement of F^2^ against ALL reflections.  The weighted R-factor wR and 
 goodness of fit S are based on F^2^, conventional R-factors R are based 
 on F, with F set to zero for negative F^2^. The threshold expression of 
 F^2^ > 2sigma(F^2^) is used only for calculating R-factors(gt) etc. and is 
 not relevant to the choice of reflections for refinement.  R-factors based 
 on F^2^ are statistically about twice as large as those based on F, and R- 
 factors based on ALL data will be even larger. 
;
_reflns_number_total                    3842
_reflns_number_gt                       3472
_reflns_threshold_expression            F^2^>2.0\s(F^2^)
_refine_ls_structure_factor_coef        Fsqd
_refine_ls_R_factor_all           0.0367 
_refine_ls_R_factor_gt            0.0320 
_refine_ls_wR_factor_ref          0.0711 
_refine_ls_wR_factor_gt           0.0691 
_refine_ls_goodness_of_fit_ref    1.003 
_refine_ls_restrained_S_all       1.003 
_refine_ls_shift/su_max           0.001 
_refine_ls_shift/su_mean          0.000 
_refine_ls_number_restraints            1
_refine_ls_hydrogen_treatment           refxyz
_refine_ls_number_reflns                3842
_refine_ls_number_parameters            290
_refine_ls_weighting_scheme             calc
_refine_ls_weighting_details
           'w = 1/[\s^2^(Fo^2^)+(0.0395P)^2^+0.0000P] where P=(Fo^2^+2Fc^2^)/3'
_atom_sites_solution_hydrogens          geom
_atom_sites_solution_primary            direct
_atom_sites_solution_secondary          difmap
_refine_diff_density_max                0.300
_refine_diff_density_min               -0.230
_refine_ls_extinction_method            SHELXL
_refine_ls_extinction_coef              0.020(2)
_refine_ls_abs_structure_details
           'Flack, H. D. (1983), Acta Cryst. A39, 876-881.  1740 Friedel Pairs'
_refine_ls_abs_structure_Flack          0.01(6)
_iucr_refine_instructions_details
;
TITL sou07130A-1
CELL  0.71075 7.06180 9.02700 13.89130 90.000 101.281 90.000
ZERR  2 0.00310 0.00370 0.00620 0.000 0.006 0.000
LATT -1
SYMM    -X, .50+Y,    -Z
SFAC C H N O S
UNIT 40 42 2 6 2
SHEL 99999.000000 0.769625
L.S. 5
FMAP 2
PLAN -25
WPDB -2
HTAB
TEMP -172.8
ACTA
BOND $H
CONF
SIZE 0.200 0.200 0.200
WGHT    0.039500
EXTI    0.019966
FVAR       1.22412
S1    5    0.685833    0.523290    0.679819    11.00000    0.01409    0.01936 =
         0.01702   -0.00382    0.00097    0.00340
O1    4    0.211156    0.685766    0.715362    11.00000    0.01597    0.03075 =
         0.02969   -0.00841    0.00369   -0.00406
H1    2    0.090380    0.646173    0.697564    11.00000   -1.50000
O2    4    0.711606    0.388580    0.735475    11.00000    0.02978    0.02139 =
         0.02381   -0.00349   -0.00459    0.00883
O3    4    0.833586    0.573657    0.629675    11.00000    0.01271    0.03657 =
         0.02310   -0.01033    0.00438   -0.00050
N1    3    0.659987    0.654319    0.755642    11.00000    0.01722    0.01562 =
         0.01544   -0.00309    0.00344    0.00026
C1    1    0.627395    0.806771    0.717970    11.00000    0.02825    0.01667 =
         0.02167   -0.00037    0.00913   -0.00232
H1A   2    0.746696    0.849320    0.720738    11.00000   -1.20000
H1B   2    0.544050    0.809152    0.651385    11.00000   -1.20000
C2    1    0.524710    0.883111    0.789136    11.00000    0.01259    0.01927 =
         0.01516   -0.00212   -0.00099    0.00033
C3    1    0.445931    0.767956    0.851417    11.00000    0.01601    0.01676 =
         0.01890   -0.00146    0.00480    0.00304
C4    1    0.487553    0.809194    0.962029    11.00000    0.02551    0.02334 =
         0.01916   -0.00261    0.00903    0.00446
H4A   2    0.485506    0.914466    0.972792    11.00000   -1.20000
H4B   2    0.387406    0.777782    0.994613    11.00000   -1.20000
C5    1    0.676984    0.734934    1.002693    11.00000    0.01996    0.02106 =
         0.01724    0.00296    0.00652   -0.00357
C6    1    0.801090    0.756250    1.092798    11.00000    0.02902    0.02195 =
         0.01634   -0.00075    0.00671   -0.00872
H6    2    0.785149    0.828053    1.138646    11.00000   -1.20000
C7    1    0.967061    0.671096    1.116386    11.00000    0.02601    0.03132 =
         0.01711    0.00664   -0.00280   -0.01054
H7    2    1.054725    0.686800    1.176793    11.00000   -1.20000
C8    1    1.009133    0.564365    1.051500    11.00000    0.01985    0.02704 =
         0.02522    0.00613    0.00142   -0.00130
H8    2    1.125338    0.507046    1.065171    11.00000   -1.20000
C9    1    0.887060    0.544059    0.960279    11.00000    0.01907    0.01934 =
         0.01919    0.00119    0.00099   -0.00066
H9    2    0.917039    0.473079    0.913312    11.00000   -1.20000
C10   1    0.722413    0.631047    0.937182    11.00000    0.01649    0.01641 =
         0.01591    0.00271    0.00416   -0.00328
C11   1    0.572056    0.629379    0.843171    11.00000    0.01383    0.01551 =
         0.01727    0.00037    0.00455   -0.00162
H11   2    0.500250    0.538015    0.836709    11.00000   -1.20000
C12   1    0.507155    1.027120    0.794517    11.00000    0.02428    0.01997 =
         0.02503    0.00162    0.00435    0.00414
H12A  2    0.562925    1.096044    0.754155    11.00000   -1.20000
H12B  2    0.446983    1.072780    0.840146    11.00000   -1.20000
C13   1    0.231443    0.737806    0.813106    11.00000    0.01744    0.02385 =
         0.02581   -0.00317    0.00686   -0.00080
H13A  2    0.151520    0.830651    0.812901    11.00000   -1.20000
H13B  2    0.193297    0.657048    0.852645    11.00000   -1.20000
C14   1    0.472246    0.509568    0.590620    11.00000    0.01223    0.02012 =
         0.01502   -0.00620    0.00157    0.00145
C15   1    0.442165    0.606167    0.511043    11.00000    0.01607    0.02140 =
         0.01667   -0.00205    0.00562   -0.00250
H15   2    0.541557    0.668381    0.504350    11.00000   -1.20000
C16   1    0.264294    0.606796    0.446484    11.00000    0.02190    0.02019 =
         0.01552    0.00022    0.00387    0.00252
H16   2    0.236802    0.679818    0.394907    11.00000   -1.20000
C17   1    0.117359    0.511242    0.460265    11.00000    0.01553    0.01989 =
         0.01811   -0.00781    0.00150    0.00223
C18   1    0.153430    0.411870    0.538448    11.00000    0.01563    0.01733 =
         0.02551   -0.00383    0.00642   -0.00301
H18   2    0.066719    0.347585    0.548660    11.00000   -1.20000
C19   1    0.327756    0.411175    0.604246    11.00000    0.02006    0.01530 =
         0.01966   -0.00004    0.00525    0.00187
H19   2    0.352068    0.354896    0.657931    11.00000   -1.20000
C20   1   -0.077593    0.515168    0.392841    11.00000    0.01964    0.02847 =
         0.02536   -0.00634   -0.00210   -0.00069
H20A  2   -0.170732    0.557896    0.428520    11.00000   -1.50000
H20B  2   -0.083457    0.581480    0.337136    11.00000   -1.50000
H20C  2   -0.121164    0.421335    0.374140    11.00000   -1.50000
HKLF 4
 
REM  sou07130A-1
REM R1 =  0.0320 for   3472 Fo > 4sig(Fo)  and  0.0367 for all   3842 data
REM    290 parameters refined using      1 restraints
 
END  
     
WGHT      0.0395      0.0000 
REM Highest difference peak  0.301,  deepest hole -0.228,  1-sigma level  0.042
Q1    1   0.5577  0.5356  0.6287  11.00000  0.05    0.30
Q2    1   0.3413  0.7594  0.8404  11.00000  0.05    0.19
Q3    1   0.9705  0.6009  0.9964  11.00000  0.05    0.18
Q4    1   0.4313  0.5629  0.5538  11.00000  0.05    0.18
Q5    1   0.7851  0.7654  0.5821  11.00000  0.05    0.18
Q6    1   0.4920  0.7047  0.8571  11.00000  0.05    0.17
Q7    1   0.6961  0.6835  0.9670  11.00000  0.05    0.17
Q8    1   0.3666  0.5862  0.4707  11.00000  0.05    0.17
Q9    1   0.1386  0.4453  0.4789  11.00000  0.05    0.17
Q10   1   0.0341  0.5061  0.4185  11.00000  0.05    0.17
Q11   1   0.4111  0.5256  0.6065  11.00000  0.05    0.16
Q12   1   0.2164  0.5470  0.4517  11.00000  0.05    0.15
Q13   1   0.1708  0.5759  0.4776  11.00000  0.05    0.15
Q14   1   0.7188  0.2539  0.7503  11.00000  0.05    0.15
Q15   1   0.3954  0.5471  0.8464  11.00000  0.05    0.15
Q16   1   0.8687  0.6495  0.6766  11.00000  0.05    0.14
Q17   1   0.7883  0.5311  0.6530  11.00000  0.05    0.14
Q18   1   0.7662  0.8997  1.0797  11.00000  0.05    0.14
Q19   1   0.5671  1.1911  0.7452  11.00000  0.05    0.14
Q20   1   0.9342  0.5290  1.0046  11.00000  0.05    0.14
Q21   1   0.1218  0.4987  0.5176  11.00000  0.05    0.14
Q22   1   0.6558  0.6351  0.8859  11.00000  0.05    0.14
Q23   1   0.1588  0.8591  0.8630  11.00000  0.05    0.14
Q24   1   0.4345  0.7973  0.9049  11.00000  0.05    0.13
Q25   1   0.3778  0.5812  0.9479  11.00000  0.05    0.13
;

loop_
_atom_type_symbol
_atom_type_description
_atom_type_scat_dispersion_real
_atom_type_scat_dispersion_imag
_atom_type_scat_source
  'C' 'C'  0.0033 0.0016 
;
International Tables for Crystallography
(1992, Vol. C, Tables 4.2.6.8 and 6.1.1.4)
;
  'H' 'H'  0.0000 0.0000 
;
International Tables for Crystallography
(1992, Vol. C, Table 6.1.1.4)
;
  'N' 'N'  0.0061 0.0033 
;
International Tables for Crystallography
(1992, Vol. C, Tables 4.2.6.8 and 6.1.1.4)
;
  'O' 'O'  0.0106 0.0060 
;
International Tables for Crystallography
(1992, Vol. C, Tables 4.2.6.8 and 6.1.1.4)
;
  'S' 'S'  0.1246 0.1234 
;
International Tables for Crystallography
(1992, Vol. C, Tables 4.2.6.8 and 6.1.1.4)
;

#==============================================================================
# ATOMIC COORDINATES AND THERMAL PARAMETERS
loop_ 
 _atom_site_label 
 _atom_site_type_symbol 
 _atom_site_fract_x 
 _atom_site_fract_y 
 _atom_site_fract_z 
 _atom_site_U_iso_or_equiv 
 _atom_site_adp_type 
 _atom_site_occupancy 
 _atom_site_symetry_multiplicity 
 _atom_site_calc_flag 
 _atom_site_refinement_flags 
 _atom_site_disorder_assembly 
 _atom_site_disorder_group 
S1 S 0.68583(6) 0.52329(5) 0.67982(3) 0.01710(11) Uani 1 1 d . . . 
O1 O 0.21116(19) 0.68577(15) 0.71536(10) 0.0256(3) Uani 1 1 d . . . 
H1 H 0.090(4) 0.646(3) 0.6976(16) 0.038 Uiso 1 1 d . . . 
O2 O 0.71161(19) 0.38858(14) 0.73548(10) 0.0263(3) Uani 1 1 d . . . 
O3 O 0.83359(17) 0.57366(15) 0.62968(9) 0.0240(3) Uani 1 1 d . . . 
N1 N 0.6600(2) 0.65432(16) 0.75564(10) 0.0161(3) Uani 1 1 d . . . 
C1 C 0.6274(3) 0.8068(2) 0.71797(15) 0.0216(4) Uani 1 1 d . . . 
H1A H 0.747(3) 0.849(2) 0.7207(15) 0.026 Uiso 1 1 d . . . 
H1B H 0.544(3) 0.809(2) 0.6514(16) 0.026 Uiso 1 1 d . . . 
C2 C 0.5247(2) 0.8831(2) 0.78914(12) 0.0162(4) Uani 1 1 d . . . 
C3 C 0.4459(2) 0.7680(2) 0.85142(13) 0.0170(4) Uani 1 1 d . . . 
C4 C 0.4876(3) 0.8092(2) 0.96203(14) 0.0220(4) Uani 1 1 d . . . 
H4A H 0.486(3) 0.914(3) 0.9728(15) 0.026 Uiso 1 1 d . . . 
H4B H 0.387(3) 0.778(2) 0.9946(16) 0.026 Uiso 1 1 d . . . 
C5 C 0.6770(3) 0.7349(2) 1.00269(13) 0.0190(4) Uani 1 1 d . . . 
C6 C 0.8011(3) 0.7563(2) 1.09280(13) 0.0221(4) Uani 1 1 d . . . 
H6 H 0.785(3) 0.828(2) 1.1386(16) 0.027 Uiso 1 1 d . . . 
C7 C 0.9671(3) 0.6711(2) 1.11639(14) 0.0258(5) Uani 1 1 d . . . 
H7 H 1.055(3) 0.687(2) 1.1768(15) 0.031 Uiso 1 1 d . . . 
C8 C 1.0091(3) 0.5644(2) 1.05150(14) 0.0244(4) Uani 1 1 d . . . 
H8 H 1.125(3) 0.507(3) 1.0652(15) 0.029 Uiso 1 1 d . . . 
C9 C 0.8871(2) 0.5441(2) 0.96028(13) 0.0196(4) Uani 1 1 d . . . 
H9 H 0.917(3) 0.473(2) 0.9133(14) 0.023 Uiso 1 1 d . . . 
C10 C 0.7224(2) 0.63105(19) 0.93718(12) 0.0161(4) Uani 1 1 d . . . 
C11 C 0.5721(2) 0.6294(2) 0.84317(12) 0.0153(4) Uani 1 1 d . . . 
H11 H 0.500(3) 0.538(2) 0.8367(13) 0.018 Uiso 1 1 d . . . 
C12 C 0.5072(3) 1.0271(2) 0.79452(14) 0.0232(4) Uani 1 1 d . . . 
H12A H 0.563(3) 1.096(2) 0.7542(15) 0.028 Uiso 1 1 d . . . 
H12B H 0.447(3) 1.073(2) 0.8401(16) 0.028 Uiso 1 1 d . . . 
C13 C 0.2314(3) 0.7378(2) 0.81311(14) 0.0220(4) Uani 1 1 d . . . 
H13A H 0.152(3) 0.831(2) 0.8129(15) 0.026 Uiso 1 1 d . . . 
H13B H 0.193(3) 0.657(2) 0.8526(15) 0.026 Uiso 1 1 d . . . 
C14 C 0.4722(2) 0.5096(2) 0.59062(11) 0.0159(3) Uani 1 1 d . . . 
C15 C 0.4422(3) 0.6062(2) 0.51104(12) 0.0177(4) Uani 1 1 d . . . 
H15 H 0.542(3) 0.668(2) 0.5043(15) 0.021 Uiso 1 1 d . . . 
C16 C 0.2643(3) 0.6068(2) 0.44648(13) 0.0192(4) Uani 1 1 d . . . 
H16 H 0.237(3) 0.680(2) 0.3949(15) 0.023 Uiso 1 1 d . . . 
C17 C 0.1174(2) 0.5112(2) 0.46027(12) 0.0181(4) Uani 1 1 d . . . 
C18 C 0.1534(3) 0.4119(2) 0.53845(14) 0.0192(4) Uani 1 1 d . . . 
H18 H 0.067(3) 0.348(2) 0.5487(15) 0.023 Uiso 1 1 d . . . 
C19 C 0.3278(3) 0.4112(2) 0.60425(13) 0.0182(4) Uani 1 1 d . . . 
H19 H 0.352(3) 0.355(2) 0.6579(15) 0.022 Uiso 1 1 d . . . 
C20 C -0.0776(3) 0.5152(3) 0.39284(14) 0.0254(4) Uani 1 1 d . . . 
H20A H -0.171(3) 0.558(3) 0.4285(16) 0.038 Uiso 1 1 d . . . 
H20B H -0.083(3) 0.581(3) 0.3371(17) 0.038 Uiso 1 1 d . . . 
H20C H -0.121(3) 0.421(3) 0.3741(17) 0.038 Uiso 1 1 d . . . 
 
loop_ 
 _atom_site_aniso_label 
 _atom_site_aniso_U_11 
 _atom_site_aniso_U_22 
 _atom_site_aniso_U_33 
 _atom_site_aniso_U_23 
 _atom_site_aniso_U_13 
 _atom_site_aniso_U_12 
S1 0.0141(2) 0.0194(2) 0.0170(2) -0.00382(18) 0.00097(14) 0.00340(19) 
O1 0.0160(7) 0.0307(8) 0.0297(8) -0.0084(6) 0.0037(5) -0.0041(6) 
O2 0.0298(8) 0.0214(8) 0.0238(7) -0.0035(6) -0.0046(6) 0.0088(6) 
O3 0.0127(6) 0.0366(8) 0.0231(7) -0.0103(6) 0.0044(5) -0.0005(5) 
N1 0.0172(7) 0.0156(8) 0.0154(8) -0.0031(6) 0.0034(6) 0.0003(6) 
C1 0.0283(10) 0.0167(10) 0.0217(10) -0.0004(8) 0.0091(8) -0.0023(8) 
C2 0.0126(8) 0.0193(10) 0.0152(8) -0.0021(7) -0.0010(6) 0.0003(7) 
C3 0.0160(8) 0.0168(9) 0.0189(9) -0.0015(7) 0.0048(7) 0.0030(7) 
C4 0.0255(10) 0.0233(11) 0.0192(9) -0.0026(8) 0.0090(7) 0.0045(8) 
C5 0.0200(9) 0.0211(10) 0.0172(9) 0.0030(7) 0.0065(7) -0.0036(7) 
C6 0.0290(10) 0.0220(10) 0.0163(9) -0.0007(8) 0.0067(7) -0.0087(8) 
C7 0.0260(10) 0.0313(12) 0.0171(10) 0.0066(8) -0.0028(8) -0.0105(9) 
C8 0.0198(9) 0.0270(12) 0.0252(10) 0.0061(8) 0.0014(7) -0.0013(8) 
C9 0.0191(8) 0.0193(11) 0.0192(9) 0.0012(7) 0.0010(6) -0.0007(8) 
C10 0.0165(8) 0.0164(9) 0.0159(8) 0.0027(7) 0.0042(6) -0.0033(7) 
C11 0.0138(8) 0.0155(9) 0.0173(8) 0.0004(7) 0.0045(6) -0.0016(7) 
C12 0.0243(9) 0.0200(10) 0.0250(9) 0.0016(9) 0.0044(7) 0.0041(9) 
C13 0.0174(9) 0.0239(11) 0.0258(10) -0.0032(8) 0.0069(7) -0.0008(8) 
C14 0.0122(7) 0.0201(9) 0.0150(8) -0.0062(8) 0.0016(6) 0.0015(8) 
C15 0.0161(9) 0.0214(10) 0.0167(9) -0.0021(7) 0.0056(7) -0.0025(7) 
C16 0.0219(9) 0.0202(10) 0.0155(8) 0.0002(7) 0.0039(7) 0.0025(8) 
C17 0.0155(8) 0.0199(9) 0.0181(8) -0.0078(8) 0.0015(6) 0.0022(8) 
C18 0.0156(9) 0.0173(10) 0.0255(10) -0.0038(8) 0.0064(7) -0.0030(7) 
C19 0.0201(9) 0.0153(9) 0.0197(9) 0.0000(7) 0.0053(7) 0.0019(7) 
C20 0.0196(9) 0.0285(11) 0.0254(9) -0.0063(10) -0.0021(7) -0.0007(10) 

#==============================================================================
_computing_data_collection             'CrystalClear (Rigaku Inc., 2008)'
_computing_cell_refinement              CrystalClear
_computing_data_reduction               CrystalClear
_computing_structure_solution          'SIR2004 (Burla, et al., 2005)'
_computing_structure_refinement        'SHELXL97 (Sheldrick, 2008)'
_computing_publication_material        'CrystalStructure 4.0 (Rigaku, 2010)'
_computing_molecular_graphics          'CrystalStructure 4.0'

#==============================================================================
# MOLECULAR GEOMETRY

_geom_special_details
;
 All esds (except the esd in the dihedral angle between two l.s. planes) 
 are estimated using the full covariance matrix.  The cell esds are taken 
 into account individually in the estimation of esds in distances, angles 
 and torsion angles; correlations between esds in cell parameters are only 
 used when they are defined by crystal symmetry.  An approximate (isotropic) 
 treatment of cell esds is used for estimating esds involving l.s. planes. 
;
 
loop_ 
 _geom_bond_atom_site_label_1 
 _geom_bond_atom_site_label_2 
 _geom_bond_distance 
 _geom_bond_site_symmetry_2 
 _geom_bond_publ_flag 
S1 O2 1.4334(15) . ? 
S1 O3 1.4370(14) . ? 
S1 N1 1.6177(15) . ? 
S1 C14 1.7591(17) . ? 
O1 C13 1.417(2) . ? 
O1 H1 0.92(3) . ? 
N1 C1 1.474(2) . ? 
N1 C11 1.487(2) . ? 
C1 C2 1.503(2) . ? 
C1 H1A 0.92(2) . ? 
C1 H1B 0.99(2) . ? 
C2 C12 1.309(3) . ? 
C2 C3 1.525(2) . ? 
C3 C13 1.528(3) . ? 
C3 C4 1.552(3) . ? 
C3 C11 1.553(3) . ? 
C4 C5 1.504(3) . ? 
C4 H4A 0.96(2) . ? 
C4 H4B 0.95(2) . ? 
C5 C10 1.387(3) . ? 
C5 C6 1.394(3) . ? 
C6 C7 1.386(3) . ? 
C6 H6 0.93(2) . ? 
C7 C8 1.391(3) . ? 
C7 H7 0.95(2) . ? 
C8 C9 1.398(3) . ? 
C8 H8 0.96(2) . ? 
C9 C10 1.388(3) . ? 
C9 H9 0.97(2) . ? 
C10 C11 1.513(2) . ? 
C11 H11 0.96(2) . ? 
C12 H12A 0.97(2) . ? 
C12 H12B 0.93(2) . ? 
C13 H13A 1.01(2) . ? 
C13 H13B 0.98(2) . ? 
C14 C15 1.391(2) . ? 
C14 C19 1.393(3) . ? 
C15 C16 1.393(2) . ? 
C15 H15 0.92(2) . ? 
C16 C17 1.391(3) . ? 
C16 H16 0.96(2) . ? 
C17 C18 1.393(3) . ? 
C17 C20 1.506(2) . ? 
C18 C19 1.382(3) . ? 
C18 H18 0.88(2) . ? 
C19 H19 0.89(2) . ? 
C20 H20A 0.98(2) . ? 
C20 H20B 0.97(2) . ? 
C20 H20C 0.92(2) . ? 
 
loop_ 
 _geom_angle_atom_site_label_1 
 _geom_angle_atom_site_label_2 
 _geom_angle_atom_site_label_3 
 _geom_angle 
 _geom_angle_site_symmetry_1 
 _geom_angle_site_symmetry_3 
 _geom_angle_publ_flag 
O2 S1 O3 120.15(8) . . ? 
O2 S1 N1 106.72(8) . . ? 
O3 S1 N1 105.63(8) . . ? 
O2 S1 C14 108.73(9) . . ? 
O3 S1 C14 106.54(8) . . ? 
N1 S1 C14 108.65(8) . . ? 
C13 O1 H1 107.6(14) . . ? 
C1 N1 C11 111.75(14) . . ? 
C1 N1 S1 118.75(12) . . ? 
C11 N1 S1 122.70(12) . . ? 
N1 C1 C2 104.86(15) . . ? 
N1 C1 H1A 107.3(13) . . ? 
C2 C1 H1A 109.7(13) . . ? 
N1 C1 H1B 111.9(12) . . ? 
C2 C1 H1B 109.1(12) . . ? 
H1A C1 H1B 113.6(17) . . ? 
C12 C2 C1 123.78(17) . . ? 
C12 C2 C3 126.52(17) . . ? 
C1 C2 C3 109.70(15) . . ? 
C2 C3 C13 111.74(15) . . ? 
C2 C3 C4 112.25(15) . . ? 
C13 C3 C4 111.73(15) . . ? 
C2 C3 C11 103.24(14) . . ? 
C13 C3 C11 111.99(15) . . ? 
C4 C3 C11 105.42(14) . . ? 
C5 C4 C3 104.31(15) . . ? 
C5 C4 H4A 114.9(13) . . ? 
C3 C4 H4A 112.6(12) . . ? 
C5 C4 H4B 112.1(13) . . ? 
C3 C4 H4B 112.6(13) . . ? 
H4A C4 H4B 100.6(18) . . ? 
C10 C5 C6 119.80(17) . . ? 
C10 C5 C4 110.96(16) . . ? 
C6 C5 C4 129.24(17) . . ? 
C7 C6 C5 119.32(18) . . ? 
C7 C6 H6 115.7(13) . . ? 
C5 C6 H6 124.9(13) . . ? 
C6 C7 C8 120.59(18) . . ? 
C6 C7 H7 120.0(14) . . ? 
C8 C7 H7 119.4(14) . . ? 
C7 C8 C9 120.41(18) . . ? 
C7 C8 H8 122.0(13) . . ? 
C9 C8 H8 117.5(13) . . ? 
C10 C9 C8 118.39(17) . . ? 
C10 C9 H9 120.2(12) . . ? 
C8 C9 H9 121.4(12) . . ? 
C5 C10 C9 121.44(16) . . ? 
C5 C10 C11 111.07(15) . . ? 
C9 C10 C11 127.49(16) . . ? 
N1 C11 C10 111.68(14) . . ? 
N1 C11 C3 106.00(14) . . ? 
C10 C11 C3 104.13(14) . . ? 
N1 C11 H11 110.5(11) . . ? 
C10 C11 H11 110.9(11) . . ? 
C3 C11 H11 113.4(11) . . ? 
C2 C12 H12A 123.3(12) . . ? 
C2 C12 H12B 122.8(13) . . ? 
H12A C12 H12B 113.7(18) . . ? 
O1 C13 C3 107.47(15) . . ? 
O1 C13 H13A 108.7(12) . . ? 
C3 C13 H13A 111.6(12) . . ? 
O1 C13 H13B 107.6(12) . . ? 
C3 C13 H13B 107.4(12) . . ? 
H13A C13 H13B 113.8(16) . . ? 
C15 C14 C19 120.36(16) . . ? 
C15 C14 S1 119.48(14) . . ? 
C19 C14 S1 119.93(14) . . ? 
C14 C15 C16 119.49(17) . . ? 
C14 C15 H15 117.6(12) . . ? 
C16 C15 H15 122.9(12) . . ? 
C17 C16 C15 120.78(17) . . ? 
C17 C16 H16 118.6(11) . . ? 
C15 C16 H16 120.4(11) . . ? 
C16 C17 C18 118.62(16) . . ? 
C16 C17 C20 121.03(17) . . ? 
C18 C17 C20 120.35(17) . . ? 
C19 C18 C17 121.45(17) . . ? 
C19 C18 H18 116.8(13) . . ? 
C17 C18 H18 121.8(14) . . ? 
C18 C19 C14 119.24(18) . . ? 
C18 C19 H19 123.8(13) . . ? 
C14 C19 H19 116.8(13) . . ? 
C17 C20 H20A 108.5(13) . . ? 
C17 C20 H20B 113.6(13) . . ? 
H20A C20 H20B 103.4(18) . . ? 
C17 C20 H20C 111.6(15) . . ? 
H20A C20 H20C 107(2) . . ? 
H20B C20 H20C 112.4(19) . . ? 
 
loop_ 
 _geom_torsion_atom_site_label_1 
 _geom_torsion_atom_site_label_2 
 _geom_torsion_atom_site_label_3 
 _geom_torsion_atom_site_label_4 
 _geom_torsion 
 _geom_torsion_site_symmetry_1 
 _geom_torsion_site_symmetry_2 
 _geom_torsion_site_symmetry_3 
 _geom_torsion_site_symmetry_4 
 _geom_torsion_publ_flag 
O2 S1 N1 C1 -179.01(14) . . . . ? 
O3 S1 N1 C1 52.05(15) . . . . ? 
C14 S1 N1 C1 -61.93(16) . . . . ? 
O2 S1 N1 C11 -30.32(15) . . . . ? 
O3 S1 N1 C11 -159.26(13) . . . . ? 
C14 S1 N1 C11 86.76(15) . . . . ? 
C11 N1 C1 C2 3.5(2) . . . . ? 
S1 N1 C1 C2 155.43(12) . . . . ? 
N1 C1 C2 C12 164.42(17) . . . . ? 
N1 C1 C2 C3 -15.96(19) . . . . ? 
C12 C2 C3 C13 80.6(2) . . . . ? 
C1 C2 C3 C13 -99.03(18) . . . . ? 
C12 C2 C3 C4 -45.8(2) . . . . ? 
C1 C2 C3 C4 134.54(16) . . . . ? 
C12 C2 C3 C11 -158.89(18) . . . . ? 
C1 C2 C3 C11 21.50(18) . . . . ? 
C2 C3 C4 C5 -91.72(18) . . . . ? 
C13 C3 C4 C5 141.85(16) . . . . ? 
C11 C3 C4 C5 19.97(19) . . . . ? 
C3 C4 C5 C10 -14.4(2) . . . . ? 
C3 C4 C5 C6 166.52(18) . . . . ? 
C10 C5 C6 C7 -1.1(3) . . . . ? 
C4 C5 C6 C7 177.92(19) . . . . ? 
C5 C6 C7 C8 -0.6(3) . . . . ? 
C6 C7 C8 C9 1.7(3) . . . . ? 
C7 C8 C9 C10 -1.0(3) . . . . ? 
C6 C5 C10 C9 1.8(3) . . . . ? 
C4 C5 C10 C9 -177.40(16) . . . . ? 
C6 C5 C10 C11 -178.21(15) . . . . ? 
C4 C5 C10 C11 2.6(2) . . . . ? 
C8 C9 C10 C5 -0.7(3) . . . . ? 
C8 C9 C10 C11 179.30(16) . . . . ? 
C1 N1 C11 C10 -103.03(17) . . . . ? 
S1 N1 C11 C10 106.34(16) . . . . ? 
C1 N1 C11 C3 9.76(19) . . . . ? 
S1 N1 C11 C3 -140.87(13) . . . . ? 
C5 C10 C11 N1 124.29(16) . . . . ? 
C9 C10 C11 N1 -55.7(2) . . . . ? 
C5 C10 C11 C3 10.33(19) . . . . ? 
C9 C10 C11 C3 -169.69(17) . . . . ? 
C2 C3 C11 N1 -18.51(17) . . . . ? 
C13 C3 C11 N1 101.85(17) . . . . ? 
C4 C3 C11 N1 -136.44(14) . . . . ? 
C2 C3 C11 C10 99.42(14) . . . . ? 
C13 C3 C11 C10 -140.22(15) . . . . ? 
C4 C3 C11 C10 -18.50(18) . . . . ? 
C2 C3 C13 O1 59.6(2) . . . . ? 
C4 C3 C13 O1 -173.74(15) . . . . ? 
C11 C3 C13 O1 -55.7(2) . . . . ? 
O2 S1 C14 C15 -162.40(13) . . . . ? 
O3 S1 C14 C15 -31.56(16) . . . . ? 
N1 S1 C14 C15 81.82(15) . . . . ? 
O2 S1 C14 C19 23.05(17) . . . . ? 
O3 S1 C14 C19 153.89(14) . . . . ? 
N1 S1 C14 C19 -92.74(16) . . . . ? 
C19 C14 C15 C16 1.8(3) . . . . ? 
S1 C14 C15 C16 -172.72(13) . . . . ? 
C14 C15 C16 C17 -0.5(3) . . . . ? 
C15 C16 C17 C18 -1.8(3) . . . . ? 
C15 C16 C17 C20 177.79(17) . . . . ? 
C16 C17 C18 C19 2.9(3) . . . . ? 
C20 C17 C18 C19 -176.69(17) . . . . ? 
C17 C18 C19 C14 -1.6(3) . . . . ? 
C15 C14 C19 C18 -0.8(3) . . . . ? 
S1 C14 C19 C18 173.75(13) . . . . ? 

#==============================================================================
loop_
_geom_hbond_atom_site_label_D
_geom_hbond_atom_site_label_H
_geom_hbond_atom_site_label_A
_geom_hbond_site_symmetry_D
_geom_hbond_site_symmetry_H
_geom_hbond_site_symmetry_A
_geom_hbond_distance_DA
_geom_hbond_distance_DH
_geom_hbond_distance_HA
_geom_hbond_angle_DHA
_geom_hbond_publ_flag
O1 H1 O3 . . 1_455 2.882(2) 0.92(3) 1.98(3) 167.5 no

#==============================================================================
# Additional structures and associated data_? identifiers
# should be added at this point if there is more than one 
# structure analysis in the CIF.

#==============================================================================
#     End of CIF
#==============================================================================
